# Supplementary material for: Unsupported Au(i)⋯Cu(i) interactions: influence of nitrile ligands and aurophilicity on the structure and luminescence
Source: Royal Society of Chemistry journal article supplement (doi:10.1039/b900768g), 2009-01-01
Supplement: b900768g.pdf [file b900768g.pdf]

## **Unsupported Au(I)···Cu(I) interactions: influence of nitrile ligands and aurophilicity on the structure and luminescence.**

**Eduardo J. Fernández,<sup>a</sup> Antonio Laguna,<sup>b</sup> José M. López-de-Luzuriaga,<sup>\*a</sup> Miguel Monge,<sup>a</sup> Manuel Montiel,<sup>a</sup> M. Elena Olmos<sup>a</sup> and María Rodríguez-Castillo<sup>a</sup>**

<sup>a</sup> Departamento de Química, Universidad de La Rioja, Grupo de Síntesis Química de La Rioja, UA-CSIC. Complejo Científico-Tecnológico, 26004-Logroño, SPAIN. Fax: +34 941 299 621. Tel: +34 941 299 644; E-mail: miguel.monge @unirioja.es

<sup>b</sup> Departamento de Química Inorgánica, Instituto de Ciencia de Materiales de Aragón, Universidad de Zaragoza-CSIC, 50009-Zaragoza, SPAIN.

### **ELECTRONIC SUPPLEMENTARY INFORMATION**

Figure S1. Phase and modulation data for complex  $[\text{AuCu}(\text{C}_6\text{F}_5)_2(\text{N}\equiv\text{CPh})_2]_2$  (**2**) recorded at different frequencies in solid state at room temperature

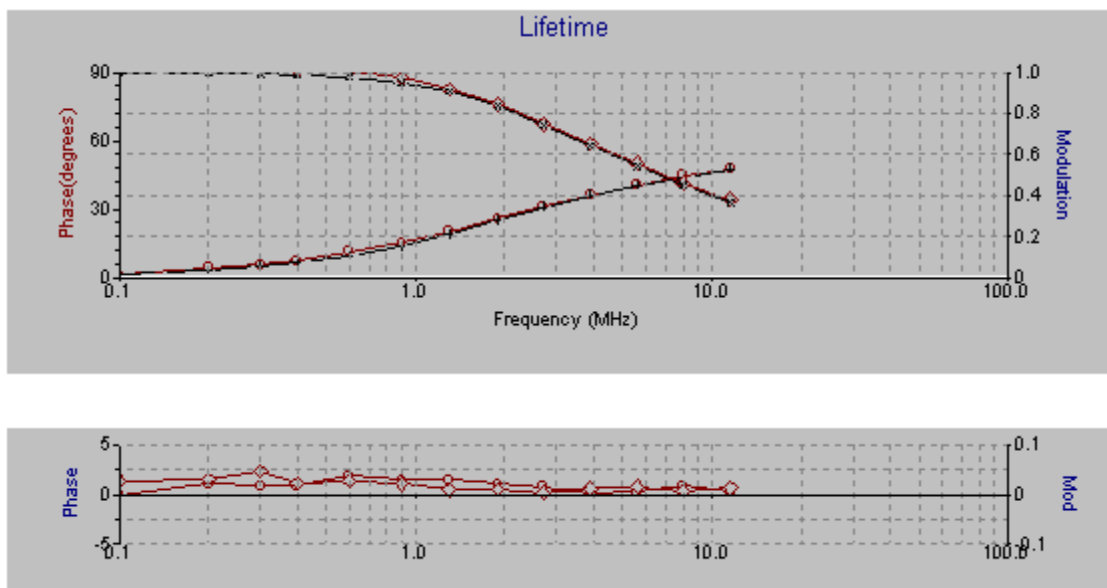

Figure S2. Molecular orbitals involved in the theoretical excitations for complex 2.

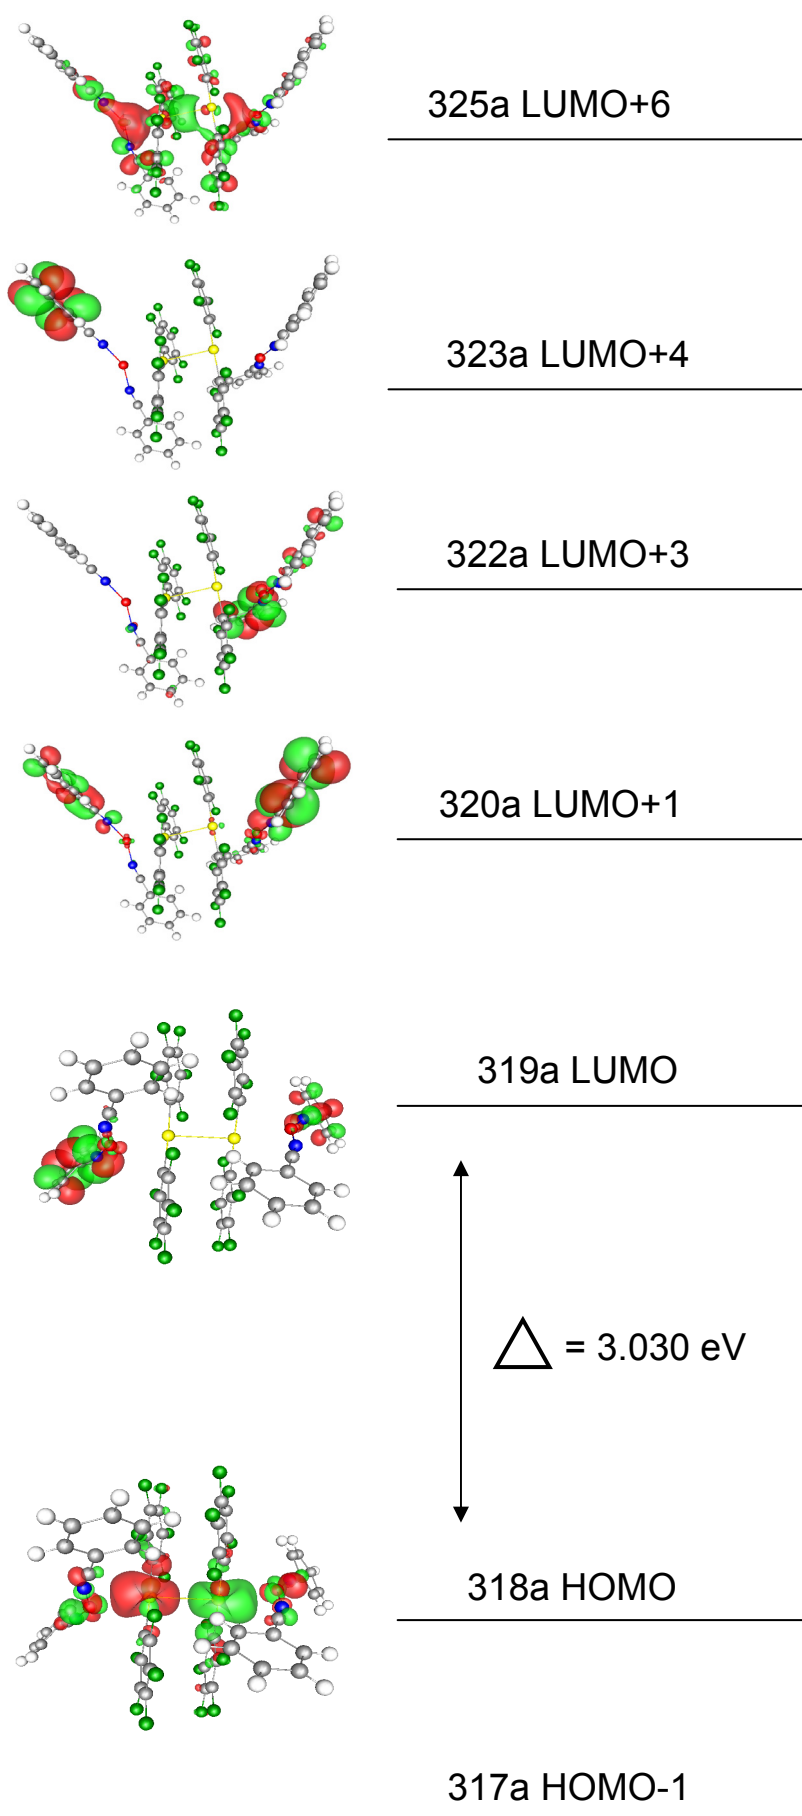

### **MOST IMPORTANT SINGLET EXCITATIONS FOR COMPLEX 2**

#### **1 singlet a excitation**

Excitation energy / eV: 2.570561103936059  
Excitation energy / nm: 482.3236600624778

Oscillator strength:  
mixed representation: 0.6808400617238028E-01

Dominant contributions:  
occ. orbital energy / eV    virt. orbital energy / eV    |coeff.|<sup>2</sup>\*100  
318 a                    -5.23                    319 a                    -2.20                    95.9

#### **2 singlet a excitation**

Excitation energy / eV: 2.637679549127771  
Excitation energy / nm: 470.0504428123861

Oscillator strength:  
mixed representation: 0.1097800516171850

Dominant contributions:  
occ. orbital energy / eV    virt. orbital energy / eV    |coeff.|<sup>2</sup>\*100  
318 a                    -5.23                    320 a                    -2.16                    95.3

#### **4 singlet a excitation**

Excitation energy / eV: 2.867950581709468  
Excitation energy / nm: 432.3095551129280

Oscillator strength:  
mixed representation: 0.2176986889319306E-01

Dominant contributions:  
occ. orbital energy / eV    virt. orbital energy / eV    |coeff.|<sup>2</sup>\*100  
318 a                    -5.23                    322 a                    -1.85                    97.2

#### **11 singlet a excitation**

Excitation energy / eV: 3.285136179811383  
Excitation energy / nm: 377.4097547870509

Oscillator strength:  
mixed representation: 0.1075028324213863E-01

Dominant contributions:  
occ. orbital energy / eV    virt. orbital energy / eV    |coeff.|<sup>2</sup>\*100  
315 a                    -5.84                    320 a                    -2.16                    90.2

#### **17 singlet a excitation**

Excitation energy / eV: 3.499534458819486  
Excitation energy / nm: 354.2878216101136

Oscillator strength:  
mixed representation: 0.2083390723691779E-01

Dominant contributions:  
occ. orbital energy / eV    virt. orbital energy / eV    |coeff.|<sup>2</sup>\*100  
313 a                    -6.19                    320 a                    -2.16                    49.9  
312 a                    -6.23                    319 a                    -2.20                    16.6  
313 a                    -6.19                    319 a                    -2.20                    14.2

**18 singlet a excitation**

Excitation energy / eV: 3.508564796640119  
xcitation energy / nm: 353.3759562462646

Oscillator strength:  
mixed representation: 0.2685116268890082E-01

Dominant contributions:

| occ. orbital | energy / eV | virt. orbital | energy / eV | coeff.  <sup>2</sup> *100 |
|--------------|-------------|---------------|-------------|---------------------------|
| 312 a        | -6.23       | 319 a         | -2.20       | 52.9                      |
| 312 a        | -6.23       | 320 a         | -2.16       | 16.5                      |
| 313 a        | -6.19       | 319 a         | -2.20       | 10.2                      |

**25 singlet a excitation**

Excitation energy / eV: 3.672948486701009  
Excitation energy / nm: 337.5605306074664

Oscillator strength:  
mixed representation: 0.5069757280015828E-01

Dominant contributions:

| occ. orbital | energy / eV | virt. orbital | energy / eV | coeff.  <sup>2</sup> *100 |
|--------------|-------------|---------------|-------------|---------------------------|
| 318 a        | -5.23       | 323 a         | -1.19       | 88.4                      |
| 318 a        | -5.23       | 325 a         | -0.96       | 9.9                       |

**27 singlet a excitation**

Excitation energy / eV: 3.696245980012412  
Excitation energy / nm: 335.4328815693484

Oscillator strength:  
mixed representation: 0.2966461032832548

Dominant contributions:

| occ. orbital | energy / eV | virt. orbital | energy / eV | coeff.  <sup>2</sup> *100 |
|--------------|-------------|---------------|-------------|---------------------------|
| 318 a        | -5.23       | 325 a         | -0.96       | 78.4                      |
| 318 a        | -5.23       | 323 a         | -1.19       | 10.7                      |

**28 singlet a excitation**

Excitation energy / eV: 3.715930681121008  
Excitation energy / nm: 333.6559657487077

Oscillator strength:  
mixed representation: 0.1524076366151150E-01

Dominant contributions:

| occ. orbital | energy / eV | virt. orbital | energy / eV | coeff.  <sup>2</sup> *100 |
|--------------|-------------|---------------|-------------|---------------------------|
| 312 a        | -6.23       | 320 a         | -2.16       | 41.7                      |
| 312 a        | -6.23       | 321 a         | -1.89       | 24.7                      |

### Structural optimisation of model system $[\text{AuCu}(\text{C}_6\text{F}_5)_2(\text{N}\equiv\text{CH})_2]$ at DFT level.

The optimization was performed using the Gaussian 03 package program.<sup>1</sup> The molecular geometry of model system  $[\text{AuCu}(\text{C}_6\text{F}_5)_2(\text{N}\equiv\text{CH})_2]$  ( $C_s$  symmetry) was optimized at DFT level of theory using the B3LYP functional.(Figure S3) The following basis set combination was employed: for the metals, the 19-VE pseudopotentials from Stuttgart and the corresponding basis sets<sup>2</sup> augmented with two f polarization functions were used.<sup>3</sup> The atoms C, F and N were treated by Stuttgart pseudopotentials,<sup>4</sup> including only the valence electrons for each atom. For these atoms double-zeta basis sets of reference 4 were used, augmented by d-type polarization functions.<sup>5</sup> For the H atom, a double-zeta, plus a p-type polarization function was used.<sup>6</sup> The results are given in Table S1.

Figure S3. Optimized a simplified model system  $[\text{AuCu}(\text{C}_6\text{F}_5)_2(\text{N}\equiv\text{CH})_2]$  at DFT-B3LYP level of theory and using a  $C_s$  symmetry.

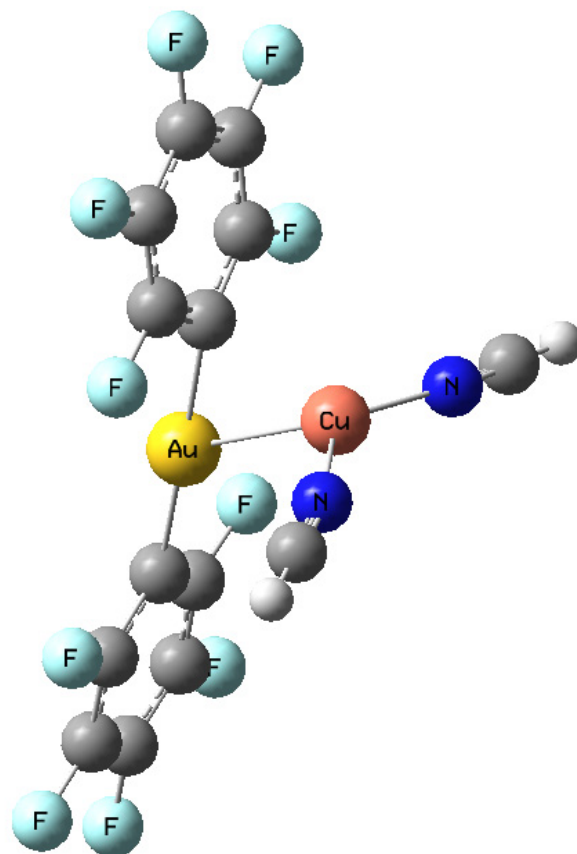

Table S1. Selected structural parameters (distances in Å and angles in deg) for complexes **1-3** and the optimised model system  $[\text{AuCu}(\text{C}_6\text{F}_5)_2(\text{N}\equiv\text{CH})_2]$  ( $C_s$  symmetry)

|                          | <i>Complex 1</i> | <i>Complex 2</i> | <i>Complex 3</i> | $[\text{AuCu}(\text{C}_6\text{F}_5)_2(\text{N}\equiv\text{CH})_2]$ |
|--------------------------|------------------|------------------|------------------|--------------------------------------------------------------------|
| Au-Cu                    | 2.93             | 2.61, 2.62       | 2.67             | 2.60                                                               |
| Au-C                     | 2.04, 2.03       | 2.07, 2.06       | 2.05, 2.03       | 2.12, 2.06                                                         |
| Cu-N                     | 1.92, 1.86       | 1.87, 1.87       | 1.87, 1.87       | 1.95, 1.95                                                         |
| Cu...C <sub>ipso</sub>   | 2.89, 4.11       | 2.72, 3.77       | 2.64, 3.98       | 2.24, 4.15                                                         |
| C-Au-C                   | 179.0            | 176.8            | 176.1            | 178.9                                                              |
| N-Cu-N                   | 151.3            | 155.2            | 155.9            | 130.9                                                              |
| C <sub>ipso</sub> -Au-Cu | 110.5, 68.8      | 107.0, 70.0      | 114.8, 66.4      | 125.6, 55.5                                                        |

References:

[1] Gaussian 03, Revision C.02, Frisch, M. J.; Trucks, G. W.; Schlegel, H. B.; Scuseria, G. E.; Robb, M. A.; Cheeseman, J. R.; Montgomery, Jr., J. A.; Vreven, T.; Kudin, K. N.; Burant, J. C.; Millam, J. M.; Iyengar, S. S.; Tomasi, J.; Barone, V.; Mennucci, B.; Cossi, M.; Scalmani, G.; Rega, N.; Petersson, G. A.; Nakatsuji, H.; Hada, M.; Ehara, M.; Toyota, K.; Fukuda, R.; Hasegawa, J.; Ishida, M.; Nakajima, T.; Honda, Y.; Kitao, O.; Nakai, H.; Klene, M.; Li, X.; Knox, J. E.; Hratchian, H. P.; Cross, J. B.; Bakken, V.; Adamo, C.; Jaramillo, J.; Gomperts, R.; Stratmann, R. E.; Yazyev, O.; Austin, A. J.; Cammi, R.; Pomelli, C.; Ochterski, J. W.; Ayala, P. Y.; Morokuma, K.; Voth, G. A.; Salvador, P.; Dannenberg, J. J.; Zakrzewski, V. G.; Dapprich, S.; Daniels, A. D.; Strain, M. C.; Farkas, O.; Malick, D. K.; Rabuck, A. D.; Raghavachari, K.; Foresman, J. B.; Ortiz, J. V.; Cui, Q.; Baboul, A. G.; Clifford, S.; Cioslowski, J.; Stefanov, B. B.; Liu, G.; Liashenko, A.; Piskorz, P.; Komaromi, I.; Martin, R. L.; Fox, D. J.; Keith, T.; Al-Laham, M. A.; Peng, C. Y.; Nanayakkara, A.; Challacombe, M.; Gill, P. M. W.; Johnson, B.; Chen, W.; Wong, M. W.; Gonzalez, C.; and Pople, J. A.; Gaussian, Inc., Wallingford CT, **2004**.

[2] Andrae, D.; Häusserman, U.; Dolg, M.; Stoll, H.; Preuss, H. *Theor. Chim. Acta* **1990**, *77*, 123.

[3] Pyykkö, P.; Runeberg, N.; Mendizabal, F. *Chem. Eur. J.* **1997**, *3*, 1451.

[4] Bergner, A.; Dolg, M.; Küchle, W.; Stoll, H.; Preuss, H. *Mol. Phys.* **1993**, *80*, 1431.

[5] Huzinaga, S. *Gaussian Basis Sets for Molecular Calculations*; Elsevier: Amsterdam, 1984; p16.

[6] Huzinaga S. *J. Chem. Phys.* **1965**, *42*, 1293.
